# Supplementary material for: The Study of Anti-/Pro-Oxidant, Lipophilic, Microbial and Spectroscopic Properties of New Alkali Metal Salts of 5-O-Caffeoylquinic Acid
Source: PubMed Central journal article supplement (PMC5855685; doi:10.3390/ijms19020463), 2018-02-04
Supplement: ijms-19-00463-s001.pdf [file ijms-19-00463-s001.pdf]

# Supplementary Materials

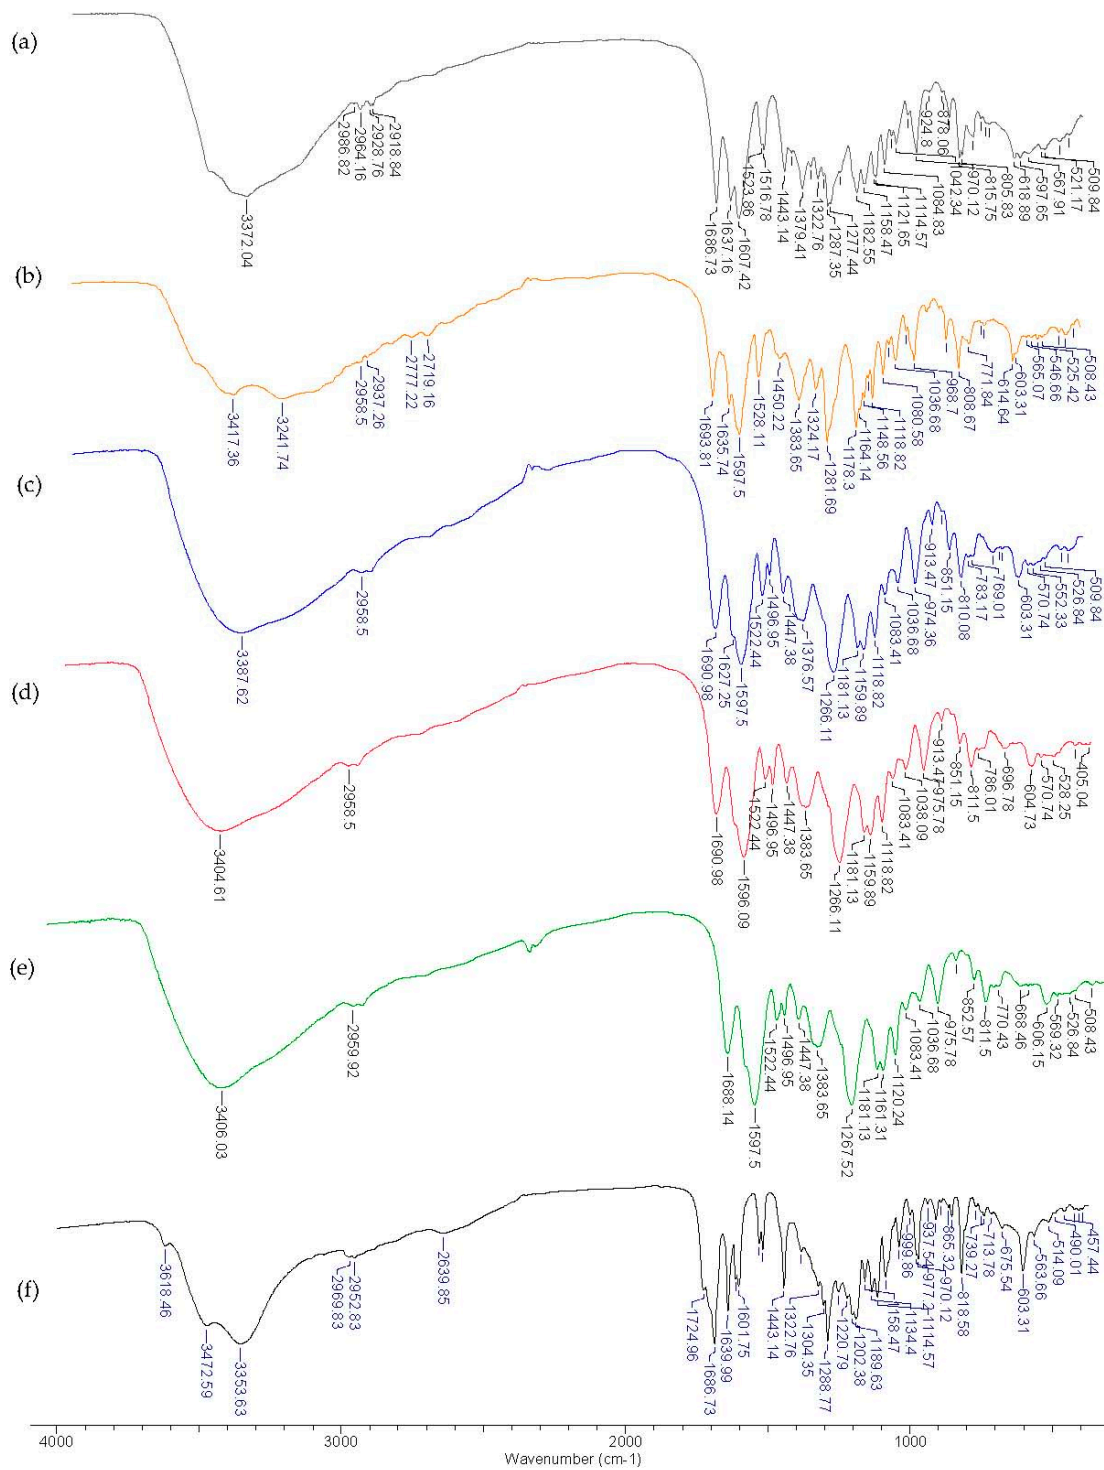

**Figure S1.** FT-IR spectra of (a) lithium; (b) sodium; (c) potassium; (d) rubidium; (e) caesium chlorogenates and (f) chlorogenic acid.

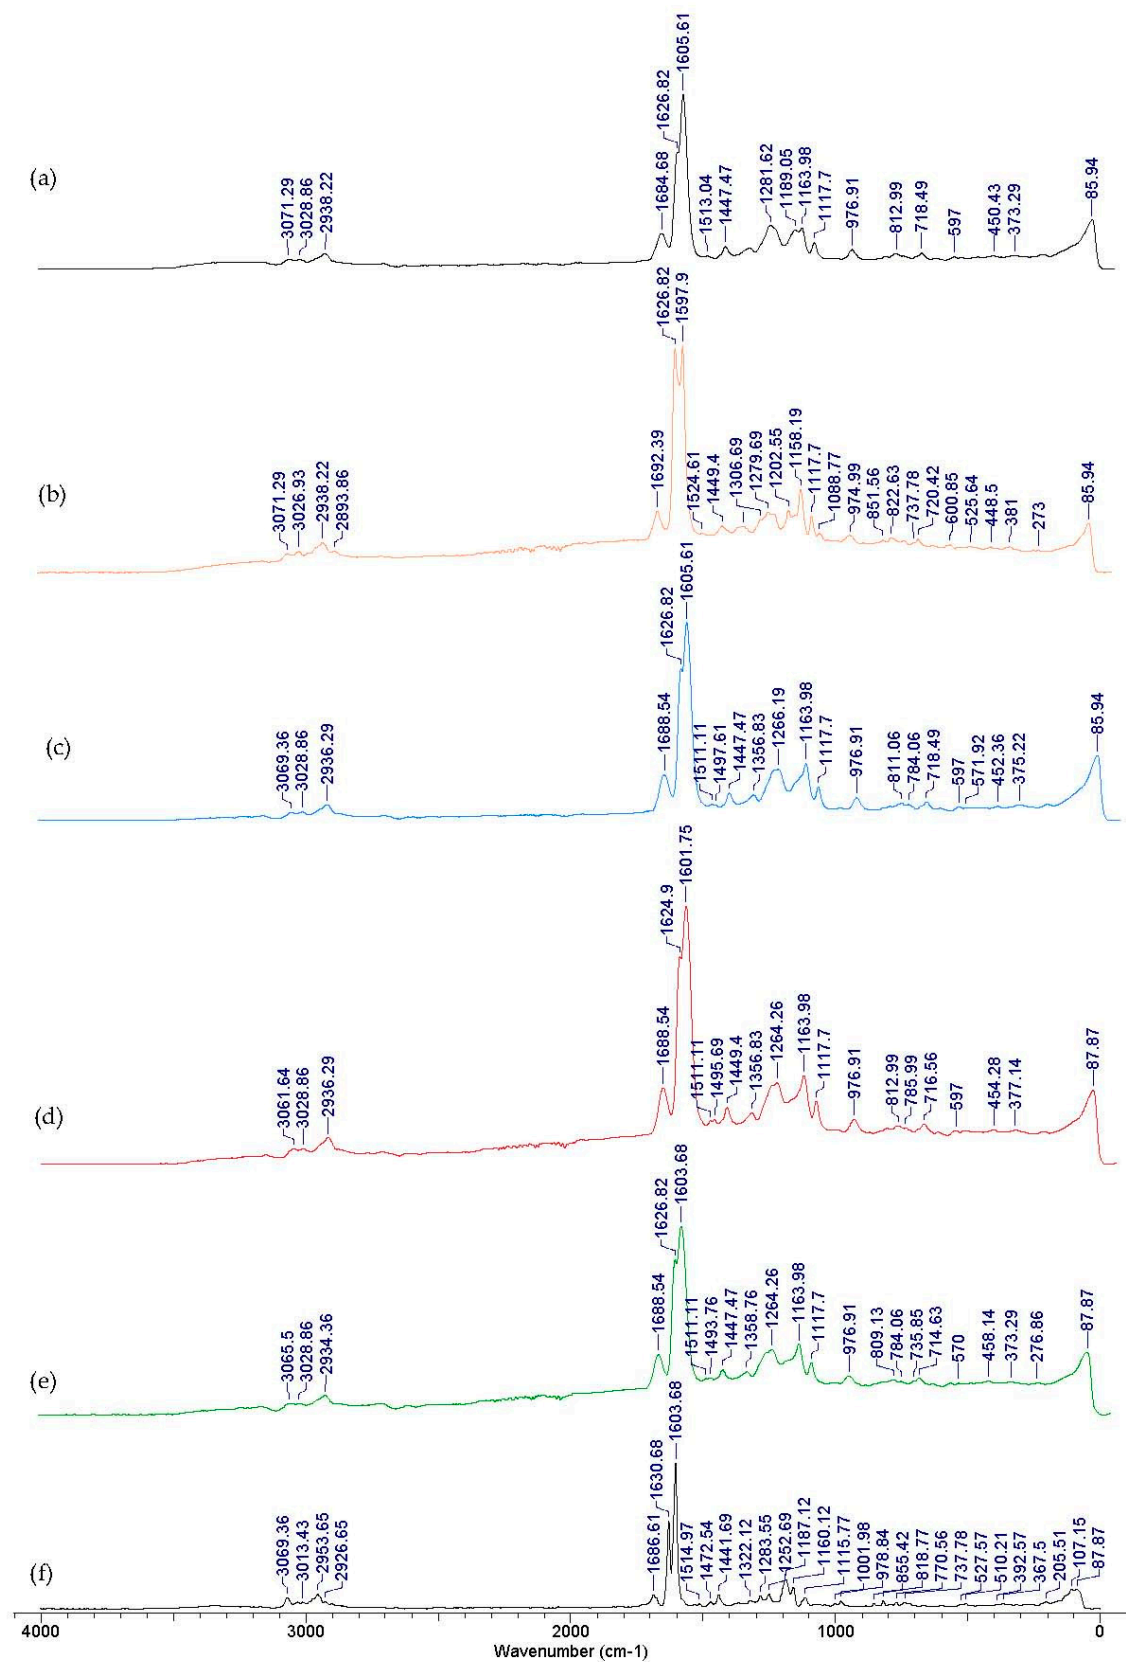

**Figure S2.** FT-Raman spectra of (a) lithium; (b) sodium; (c) potassium; (d) rubidium; (e) caesium chlorogenates and (f) chlorogenic acid.

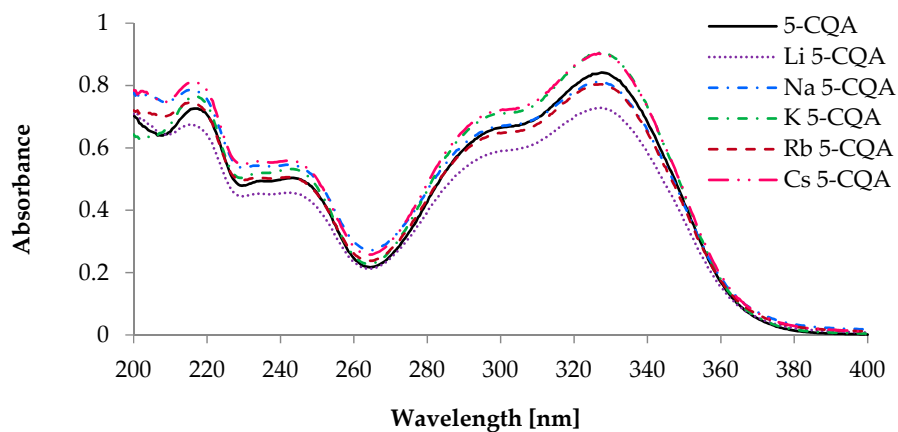

**Figure S3.** The UV spectra of alkali metal chlorogenates and chlorogenic acid registered in methanolic solution.

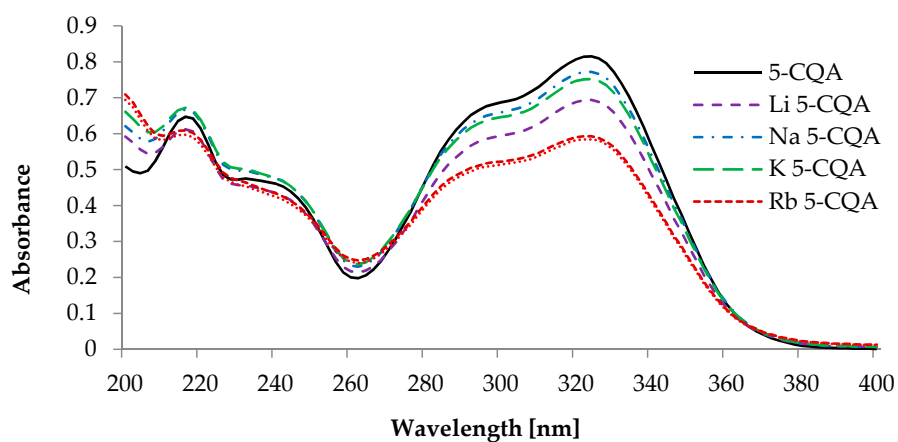

**Figure S4.** The UV spectra of alkali metal chlorogenates and chlorogenic acid registered in aqueous solution.

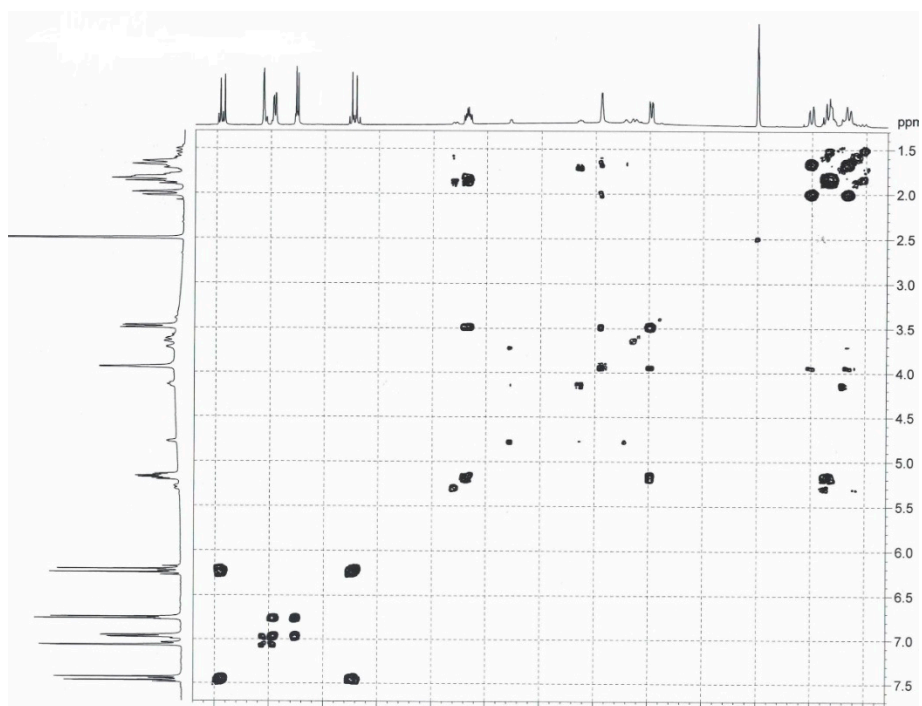

(a)

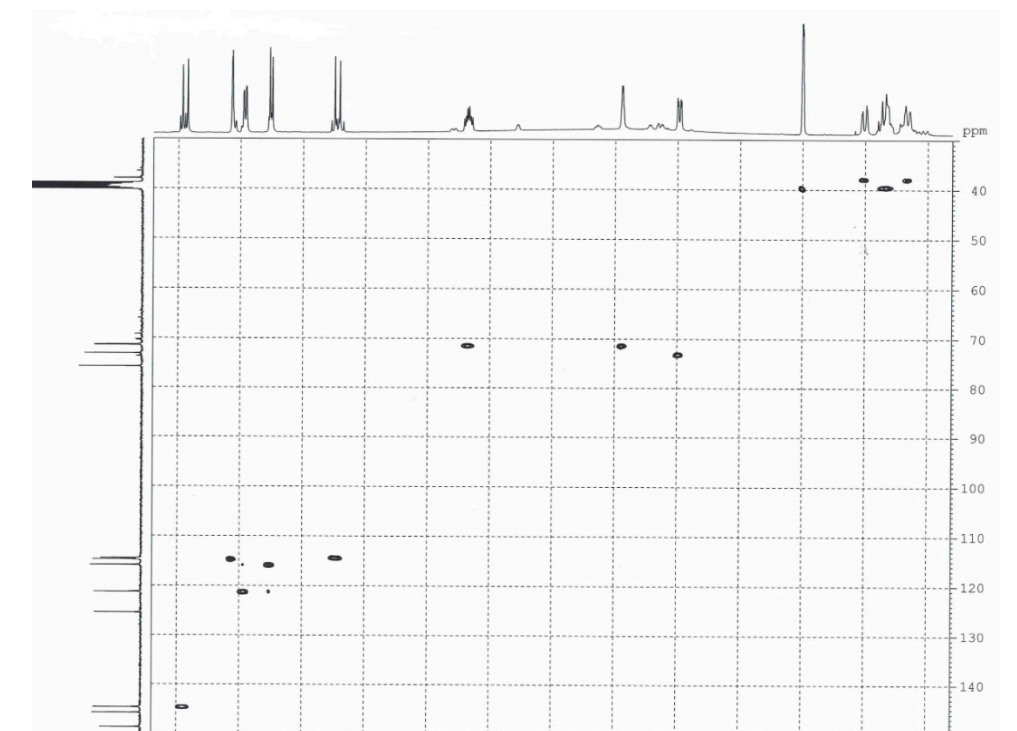

(b)

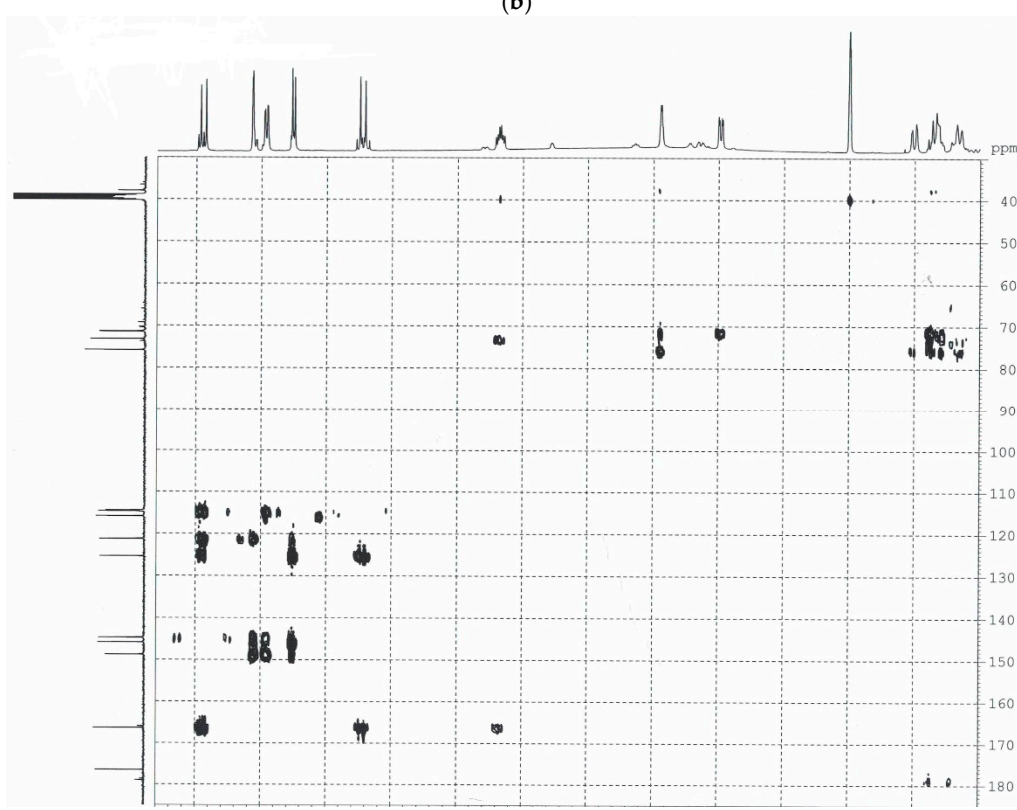

(c)

Figure S5. 2D (a) COSY; (b) HSQC; (c) HMBC NMR spectra recorded for Li chlorogenate.

**Table S1.** The square of the correlation coefficients for the linear relationship between  $\log k_w$  determined by chromatographic method for chlorogenic acid and chlorogenates.

|     | C18    | C8     | CN     | IAM    | PHE |
|-----|--------|--------|--------|--------|-----|
| C18 | -      |        |        |        |     |
| C8  | 0.8982 | -      |        |        |     |
| CN  | 0.9184 | 0.9537 | -      |        |     |
| IAM | 0.9865 | 0.8782 | 0.8991 | -      |     |
| PHE | 0.9578 | 0.8930 | 0.9742 | 0.9300 | -   |

**Table S2.** Selected bond distances [ $\text{\AA}$ ], angles [ $^\circ$ ] calculated for 5-CQA and Li, Na and K 5-CQAs in gas phase and methanol in B3LYP/6-311++G\*\*.

| Distance [ $\text{\AA}$ ]                       | 5-CQA   |         | Li 5-CQA |         | Na 5-CQA |         | K 5-CQA |         |
|-------------------------------------------------|---------|---------|----------|---------|----------|---------|---------|---------|
|                                                 | Gas     | MeOH    | Gas      | MeOH    | Gas      | MeOH    | Gas     | MeOH    |
| C7-O5                                           | 1.208   | 1.334   | 1.263    | 1.255   | 1.259    | 1.253   | 1.257   | 1.252   |
| C7-O4                                           | 1.344   | 1.211   | 1.274    | 1.266   | 1.270    | 1.266   | 1.270   | 1.266   |
| C1-O1                                           | 1.429   | 1.434   | 1.433    | 1.441   | 1.435    | 1.443   | 1.435   | 1.443   |
| O1-H1                                           | 0.969   | 0.971   | 0.971    | 0.975   | 0.973    | 0.978   | 0.974   | 0.979   |
| C3-O2                                           | 1.417   | 1.429   | 1.419    | 1.432   | 1.420    | 1.432   | 1.420   | 1.432   |
| O2-H8                                           | 0.967   | 0.970   | 0.968    | 0.971   | 0.969    | 0.972   | 0.969   | 0.972   |
| C4-O3                                           | 1.415   | 1.423   | 1.417    | 1.426   | 1.418    | 1.426   | 1.419   | 1.426   |
| O3-H9'                                          | 0.964   | 0.965   | 0.963    | 0.965   | 0.963    | 0.965   | 0.963   | 0.965   |
| C9'-O4'                                         | 1.366   | 1.367   | 1.362    | 1.359   | 1.360    | 1.358   | 1.359   | 1.358   |
| C9'-O3'                                         | 1.210   | 1.216   | 1.211    | 1.217   | 1.211    | 1.217   | 1.211   | 1.217   |
| C8'-C7'                                         | 1.349   | 1.347   | 1.344    | 1.347   | 1.344    | 1.347   | 1.343   | 1.347   |
| C3'-O1'                                         | 1.364   | 1.367   | 1.364    | 1.367   | 1.365    | 1.367   | 1.364   | 1.367   |
| O1'-H3'                                         | 0.963   | 0.965   | 0.963    | 0.965   | 0.963    | 0.965   | 0.963   | 0.965   |
| C4'-O2'                                         | 1.360   | 1.361   | 1.361    | 1.361   | 1.362    | 1.362   | 1.362   | 1.362   |
| O2'-H4'                                         | 0.963   | 0.965   | 0.963    | 0.965   | 0.963    | 0.965   | 0.963   | 0.965   |
| <b>Angles [<math>^\circ</math>]</b>             |         |         |          |         |          |         |         |         |
| O5-C7-O4                                        | 123.43  | 124.26  | 121.70   | 123.84  | 124.19   | 125.56  | 125.03  | 126.27  |
| C1-O1-H1                                        | 107.99  | 107.63  | 106.37   | 104.43  | 105.30   | 103.59  | 104.64  | 103.14  |
| C3-O2-H8                                        | 108.50  | 107.61  | 108.08   | 107.23  | 107.85   | 107.02  | 107.79  | 107.04  |
| C4-O3-H9                                        | 107.55  | 107.66  | 107.41   | 107.59  | 107.32   | 107.57  | 107.26  | 107.55  |
| O3'-C9'-O4'                                     | 123.09  | 122.87  | 123.44   | 123.06  | 123.67   | 123.13  | 123.76  | 123.13  |
| H7'-C7'-C8'-H8'                                 | -179.76 | -179.75 | -179.71  | -179.83 | 179.65   | -179.89 | 179.80  | -179.80 |
| O1'-C3'-C4'-O2'                                 | -0.034  | -0.134  | -0.054   | -0.018  | -0.001   | -0.063  | -0.016  | -0.065  |
| H3'-O1'-C3'                                     | 109.62  | 109.85  | 109.56   | 109.81  | 109.50   | 109.80  | 109.48  | 109.79  |
| H4'-O2'-C4'                                     | 109.66  | 110.02  | 109.58   | 110.01  | 109.57   | 109.97  | 109.52  | 109.94  |
| <b>Hydrogen Bonds [<math>\text{\AA}</math>]</b> |         |         |          |         |          |         |         |         |
| H1...O4                                         | 2.042   | 2.047   | 1.963    | 1.901   | 1.924    | 1.868   | 1.903   | 1.853   |
| H8...O1                                         | 1.978   | 1.941   | 1.957    | 1.909   | 1.939    | 1.893   | 1.937   | 1.899   |
| H9...O4'                                        | 2.377   | 2.440   | 2.369    | 2.442   | 2.365    | 2.433   | 2.357   | 2.425   |

**Table S3.** Selected NBO atomic charges [e] calculated for 5-CQA and Li, Na and K 5-CQAs in gas phase and methanol in B3LYP/6-311++G\*\*.

| Atomic Charges [e] | 5-CQA  |        | Li 5-CQA |        | Na 5-CQA |        | K 5-CQA |        |
|--------------------|--------|--------|----------|--------|----------|--------|---------|--------|
|                    | Gas    | MeOH   | Gas      | MeOH   | Gas      | MeOH   | Gas     | MeOH   |
| O4                 | -0.608 | -0.631 | -0.846   | -0.810 | -0.834   | -0.800 | -0.835  | -0.822 |
| O5                 | -0.677 | -0.671 | -0.818   | -0.825 | -0.805   | -0.823 | -0.806  | -0.799 |
| C7                 | 0.865  | 0.816  | 0.771    | 0.770  | 0.770    | 0.771  | 0.773   | 0.773  |
| C1                 | 0.189  | 0.191  | 0.189    | 0.186  | 0.190    | 0.186  | 0.186   | 0.183  |
| O1                 | -0.778 | -0.787 | -0.789   | -0.812 | -0.797   | -0.818 | -0.801  | -0.821 |
| H1                 | 0.497  | 0.502  | 0.500    | 0.504  | 0.501    | 0.504  | 0.501   | 0.503  |
| C3                 | 0.119  | 0.115  | 0.119    | 0.116  | 0.119    | 0.116  | 0.119   | 0.116  |
| O2                 | -0.740 | -0.774 | -0.746   | -0.782 | -0.750   | -0.784 | -0.751  | -0.785 |
| H8                 | 0.481  | 0.488  | 0.488    | 0.490  | 0.484    | 0.491  | 0.484   | 0.491  |
| C4                 | 0.100  | 0.094  | 0.100    | 0.094  | 0.100    | 0.095  | 0.100   | 0.096  |
| O3                 | -0.721 | -0.752 | -0.724   | -0.754 | -0.725   | -0.755 | -0.726  | -0.755 |
| H9                 | 0.468  | 0.478  | 0.462    | 0.477  | 0.461    | 0.475  | 0.460   | 0.476  |
| C3'                | 0.272  | 0.264  | 0.271    | 0.264  | 0.271    | 0.264  | 0.271   | 0.264  |
| O1'                | -0.657 | -0.685 | -0.658   | -0.685 | -0.658   | -0.685 | -0.659  | -0.685 |
| H3'                | 0.469  | 0.489  | 0.468    | 0.489  | 0.468    | 0.489  | 0.468   | 0.489  |
| C4'                | 0.298  | 0.291  | 0.290    | 0.294  | 0.289    | 0.290  | 0.288   | 0.290  |
| O2'                | -0.649 | -0.675 | -0.651   | -0.676 | -0.652   | -0.676 | -0.652  | 0.676  |
| H4'                | 0.469  | 0.491  | 0.468    | 0.491  | 0.468    | 0.491  | 0.468   | 0.491  |
